# Supplementary material for: Lactate increases stemness of CD8 + T cells to augment anti-tumor immunity
Source: PubMed Central journal article supplement (PMC9448806; doi:10.1038/s41467-022-32521-8), 2022-09-06
Supplement: 41467_2022_32521_MOESM1_ESM.pdf [file 41467_2022_32521_MOESM1_ESM.pdf]

## Supplementary Information

### Lactate Increases Stemness of CD8+ T Cells to Augment Anti-Tumor Immunity

Qiang Feng<sup>1, †</sup>, Zhida Liu<sup>2, †</sup>, Xuexin Yu<sup>3, †</sup>, Tongyi Huang<sup>1</sup>, Jiahui Chen<sup>1</sup>, Jian Wang<sup>1</sup>, Jonathan Wilhelm<sup>1</sup>, Suxin Li<sup>1</sup>, Jiwon Song<sup>1</sup>, Wei Li<sup>1</sup>, Zhichen Sun<sup>1</sup>, Baran Sumer<sup>4,\*</sup>, Bo Li<sup>3,5,\*</sup>, Yang-Xin Fu<sup>2,5,\*</sup>, Jinming Gao<sup>1,4,6\*</sup>

<sup>1</sup>Department of Pharmacology, Harold C. Simmons Comprehensive Cancer Center, University of Texas Southwestern Medical Center, Dallas, TX 75390, USA.

<sup>2</sup>Department of Pathology, University of Texas Southwestern Medical Center, Dallas, TX 75390, USA

<sup>3</sup>Lyda Hill Department of Bioinformatics, University of Texas Southwestern Medical Center, Dallas, TX 75390, USA

<sup>4</sup>Department of Otolaryngology, University of Texas Southwestern Medical Center, Dallas, TX 75390, USA

<sup>5</sup>Department of Immunology, University of Texas Southwestern Medical Center, Dallas, TX 75390, USA

<sup>6</sup>Department of Cell Biology, University of Texas Southwestern Medical Center, Dallas, TX 75390, USA

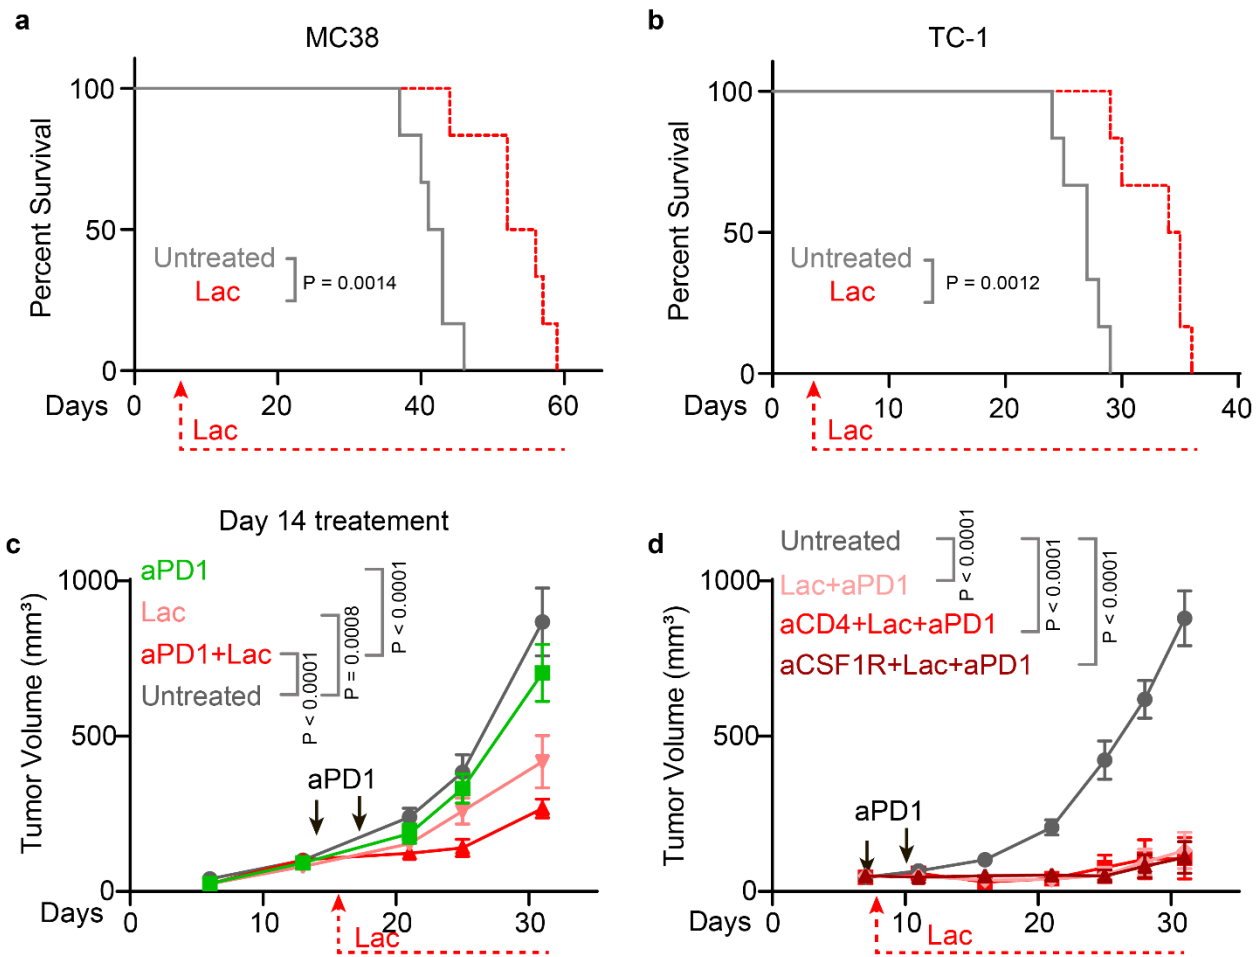

**Supplementary Fig. 1. Tumor growth curves of lactate monotherapy and combination therapy with immune cell depletion.**

Survival curves of lactate treatment in the MC38 (**a**) and TC-1 (**b**) tumor models. C57BL/6 mice ( $n = 6$ ) were inoculated with  $1 \times 10^6$  MC38 tumor cells and treated by lactate. The dose and treatment regimen of lactate is the same as **Fig. 2b**. The untreated group used the same data in **Fig. 2b** for a side-by-side comparison. C57BL/6 mice ( $n = 6$ ) were inoculated with  $1.5 \times 10^5$  TC-1 tumor cells and treated with lactate. The dose and treatment regimen of lactate is the same as **Fig. 2c**.

**c**, Tumor growth curve of MC38 tumor model treated with lactate and anti-PD1 from day 14. C57BL/6 mice ( $n = 5$ ) were inoculated with  $1 \times 10^6$  MC38 tumor cells and treated by lactate. The dose of lactate is the same as **Fig. 2b**. The initial dose of anti-PD1 was on day 14.

**d**, CD4<sup>+</sup> T and macrophage cell depletion assays in the MC38 tumor model. C57BL/6 mice ( $n = 6$ ) were inoculated with  $1 \times 10^6$  MC38 tumor cells and treated with anti-PD-1 (10 mg/kg, day 7 and 10) in combination with glucose or lactate. Anti-CD4 (10 mg/kg) or anti-CSF1R (20 mg/kg) was

administered from day 3 and then every three days until the end of the experiment. The dose and treatment regimen of lactate and anti-PD-1 are the same as **Fig. 2e**. The untreated and aPD1+Lac group used the same data in **Fig. 1e** for a side-by-side comparison. Data are shown as means  $\pm$  SEM. P value was determined by one-tail two-way ANOVA with correction using Geisser-Greenhouse method. Source data and summary of all P values are provided in Source Data file.

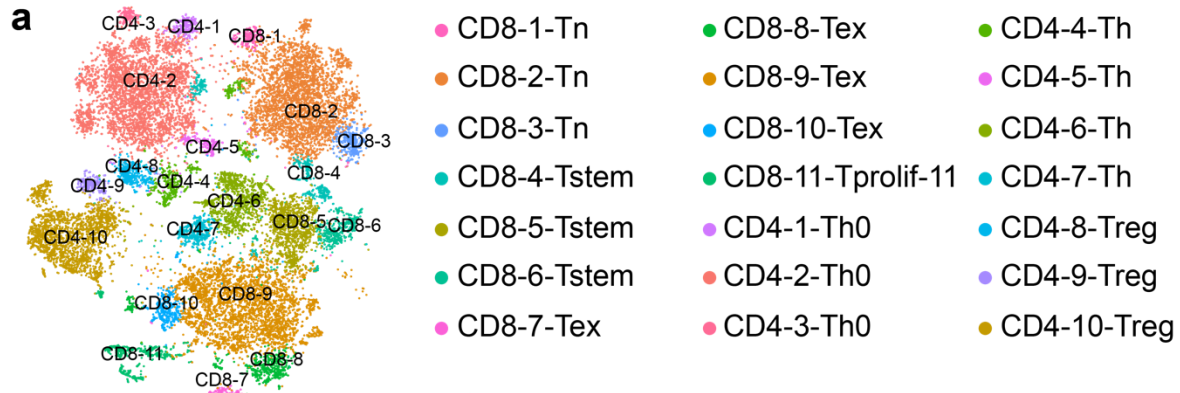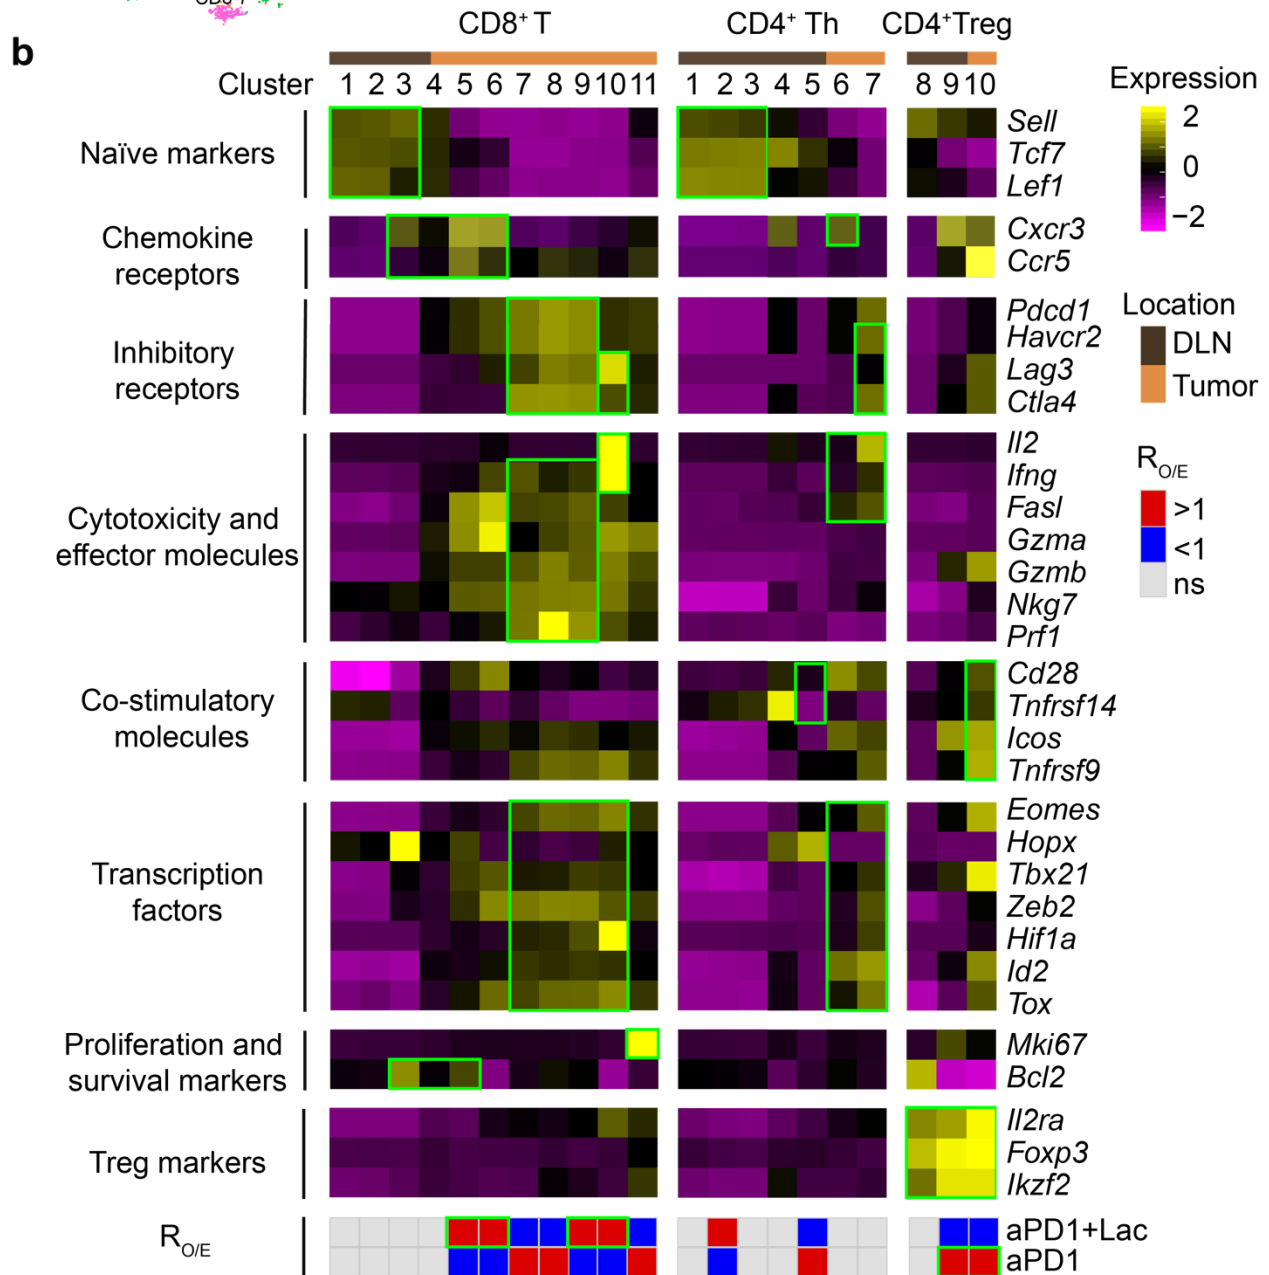

**Supplementary Fig. 2. Clustering of T cells from single cell RNA sequencing analysis.**

**a**, The tSNE projection of 21, 826 single T cells from 2 treatment groups, showing the formation of 21 main clusters, including 11 for CD8<sup>+</sup> T cells, 7 for conventional CD4<sup>+</sup> T helper cells (Th: 1-7 of CD4<sup>+</sup> clusters) and 3 for regulatory T cells (Treg: 8-10 of CD4<sup>+</sup> clusters). Each dot corresponds to one single cell, colored according to cell cluster. **b**, Mean expression of selected T cell function-associated genes in each cell cluster. Green boxes highlight the prominent patterns defining known T cell subtypes. The ratio of observed cell number to expectation ( $R_{O/E}$ ) of Lac effect on anti-PD-1 treatment for each cluster was calculated by one-tail Chi-square test. Source data are provided as a Source Data file.

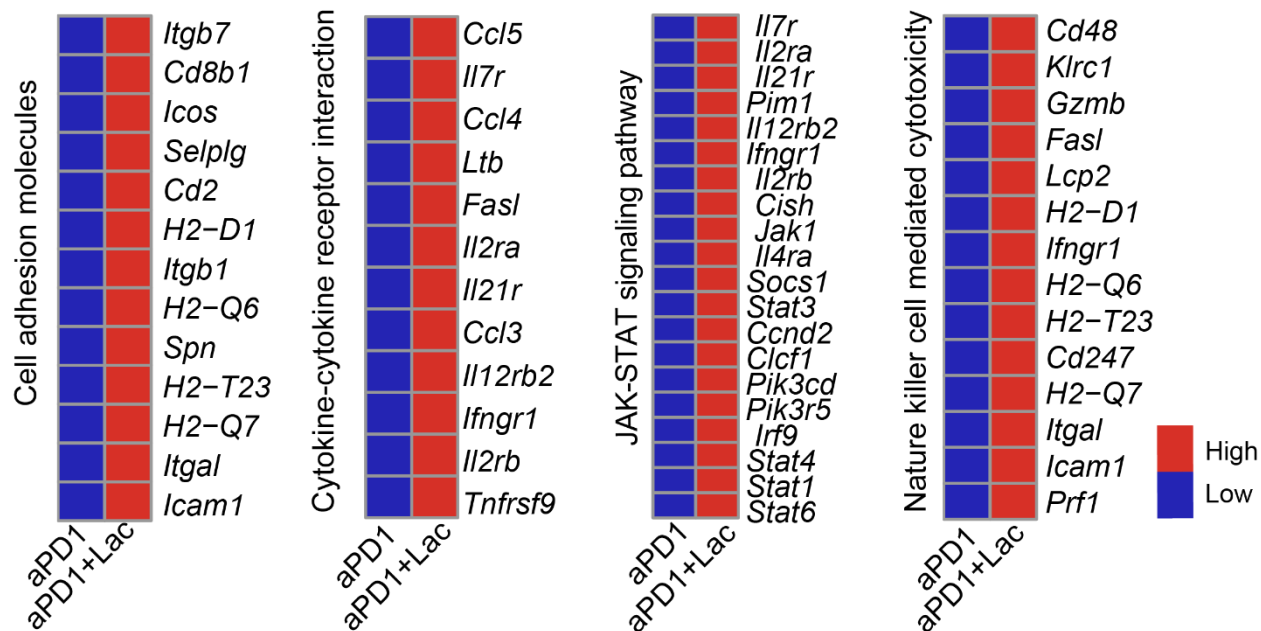

**Supplementary Fig. 3. Differentially expressed genes from GSEA analysis in Figure 3.** Source data are provided as a Source Data file.

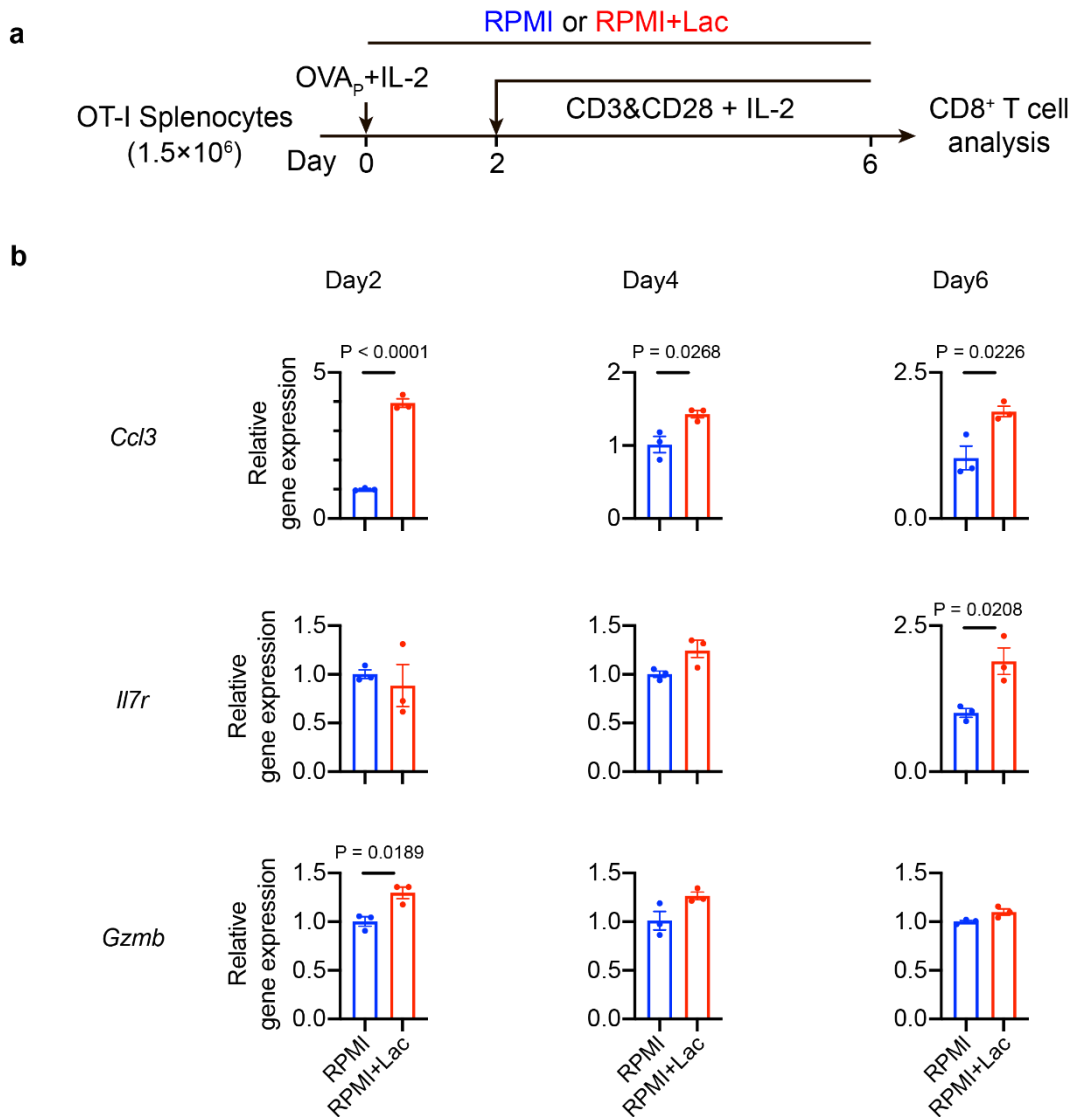

**Supplementary Fig. 4. Verification of the expression of genes elevated by lactate treatment from single cell analysis.**

**a**, Schematic illustration of the CD8<sup>+</sup> T cell culture assay. **b**, Gene expression quantified with qPCR for *Ccl3*, *Il7r*, and *Gzmb*. Data are shown as means  $\pm$  SEM.  $n = 3$  biologically independent samples. P value was determined by one-tail unpaired t-test. Source data are provided as a Source Data file.

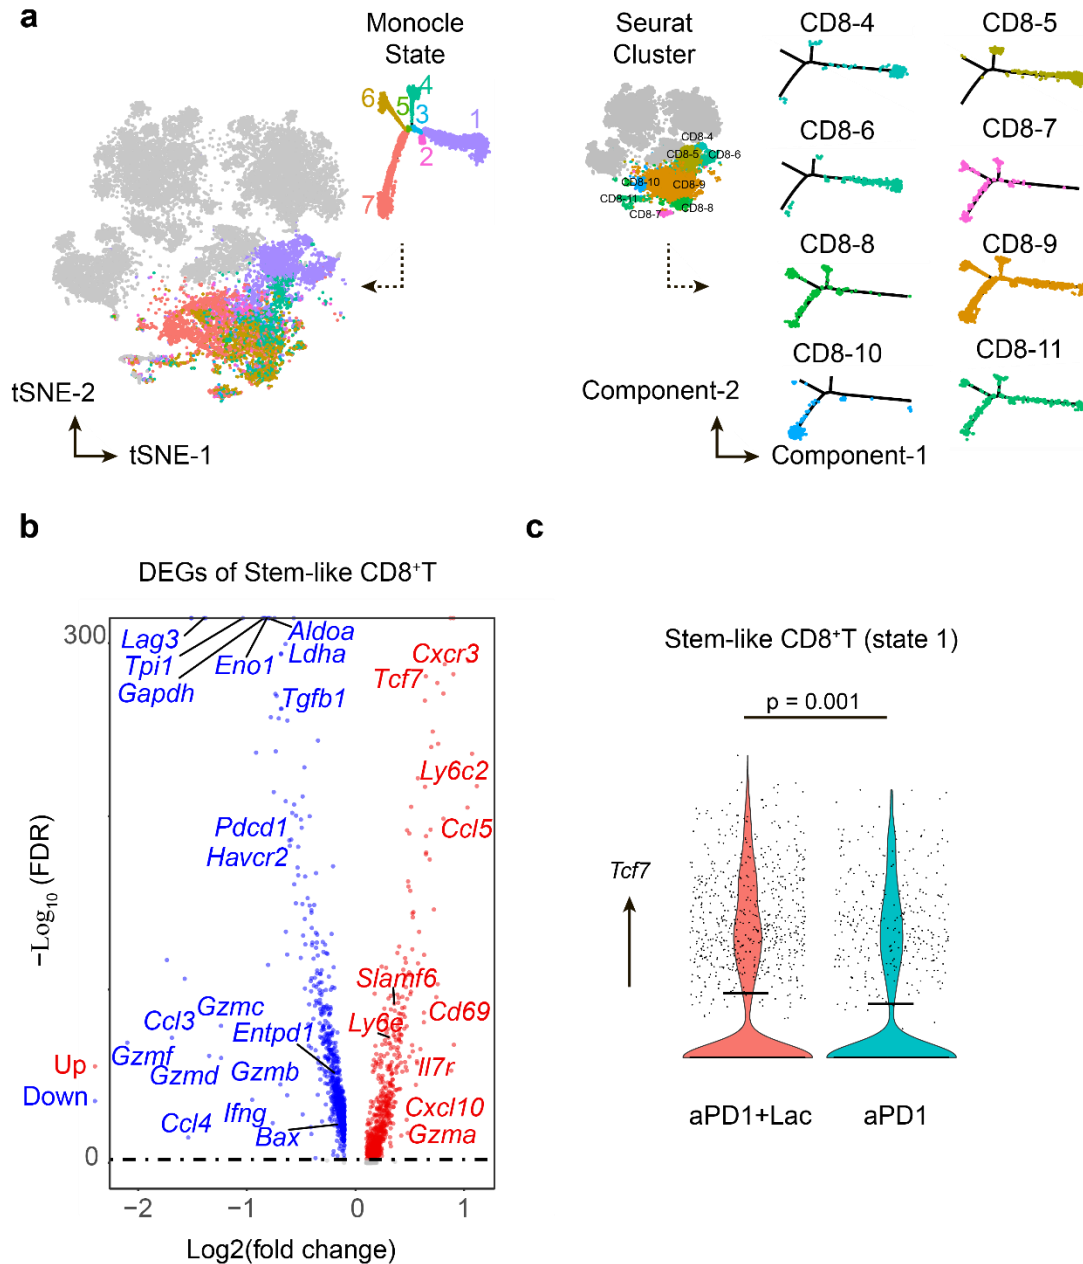

**Supplementary Fig. 5. Delineation of stem-like CD8<sup>+</sup> T cell population by pseudotime analysis.**

**a**, Correlation of Seurat clusters and monocle states. Stem-like T cells in state 1 are mostly from Seurat cluster CD8-4, CD8-5, CD8-6 and part of CD8-9. **b**, Volcano plot of differentially expressed genes by stem-like CD8<sup>+</sup> T cells. **c**, *Tcf7* gene expression in stem-like CD8<sup>+</sup> T cells.  $p$  value was determined by two-tail Mann Whitney U test. Source data are provided as a Source Data file.



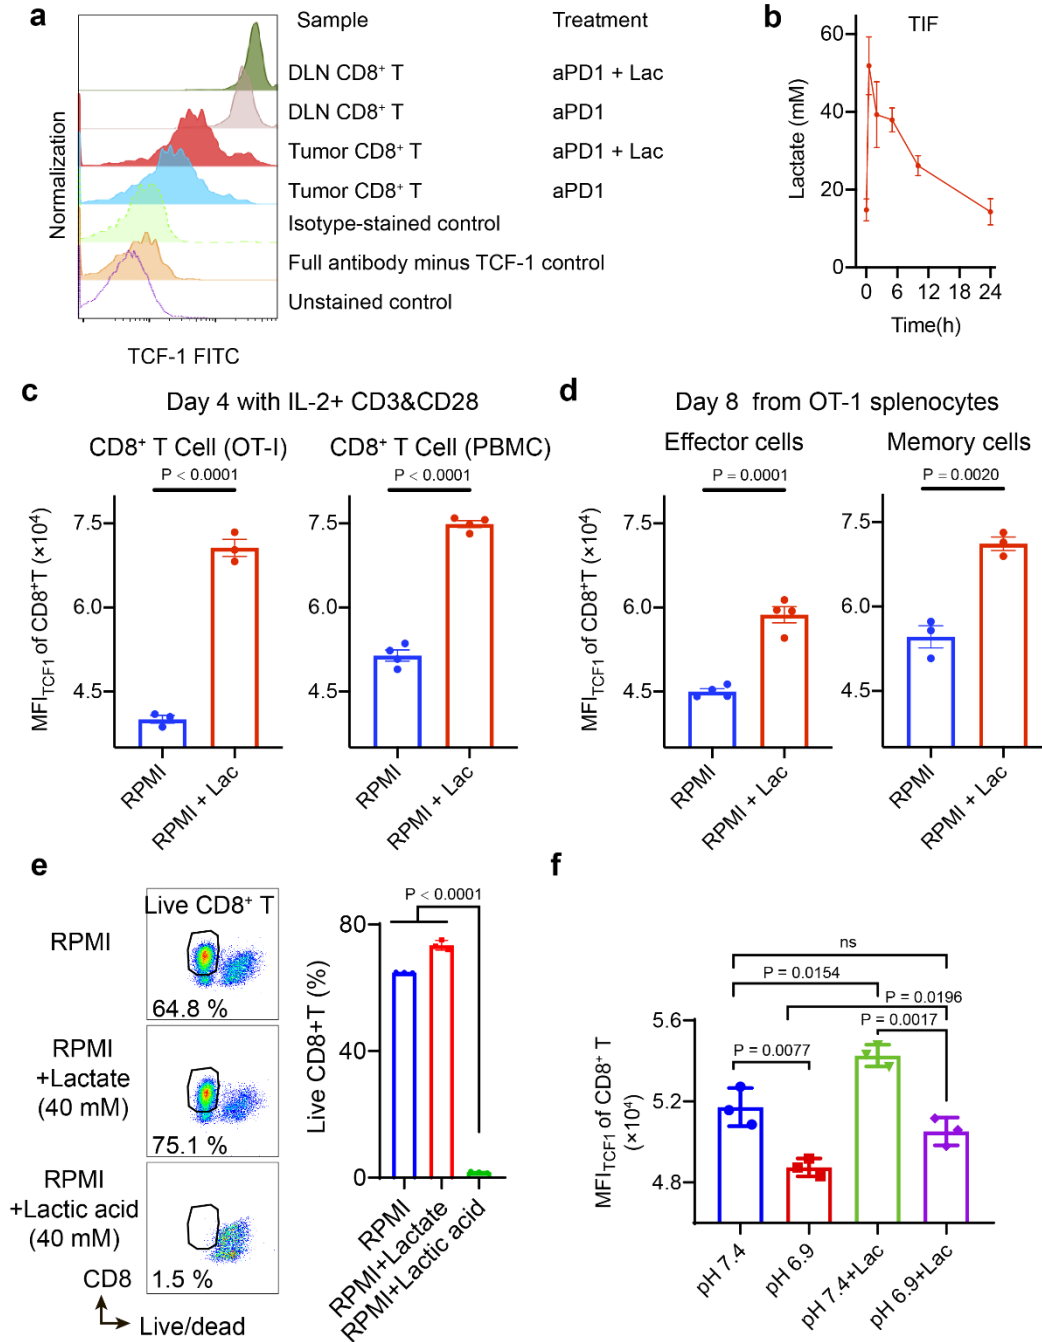

**Supplementary Fig. 6. Lactate increases the expression of TCF-1 *in vivo* and *ex vivo* while lactic acid induces T cell death.**

**a**, Flow cytometry histograms of TCF-1 expressions on CD8<sup>+</sup> T cells under different treatment conditions. Unstained control, full antibody minus anti-TCF-1 and isotype IgG were used as controls. **b**, Lactate concentration in tumor interstitial fluids (TIF) after subcutaneous lactate injection (n = 3 biologically independent samples). **c**, Quantification of TCF-1 expressions in *ex*

*in vivo* cultured CD8<sup>+</sup> T cells from OT-I mice or human PBMCs on day 4 (n = 3 biologically independent samples for OT-I cell, n = 4 biologically independent samples for PBMC). **d**, Quantification of TCF-1 expressions in *ex vivo* cultured effector or memory CD8<sup>+</sup> T cells on day 8. For memory T cells induction, CD8<sup>+</sup> T cells from OT-1 splenocytes were activated with OVAp for two days and purified with ficoll, followed by 6-Day culture with addition of IL-15 (20 ng/mL) (n = 4 biologically independent samples for effector cell culture, n = 3 biologically independent samples for memory cell culture). **e**, Flow cytometry plot and quantification of live CD8<sup>+</sup> T cells from OT-I mice in RPMI medium with sodium lactate (pH 7.4) or lactic acid (pH 4.6) after two days (n = 3 biologically independent samples). **f**, Quantification of TCF-1 expression in CD8<sup>+</sup> T cells cultured in medium with mildly acidic pH and lactate concentrations (n = 3 biologically independent samples). Data are shown as means ± SEM. P value was determined by two-tail unpaired t-test (**c**, **d**) or one-tail one-way ANOVA (**e**, **f**). Source data are provided as a Source Data file.

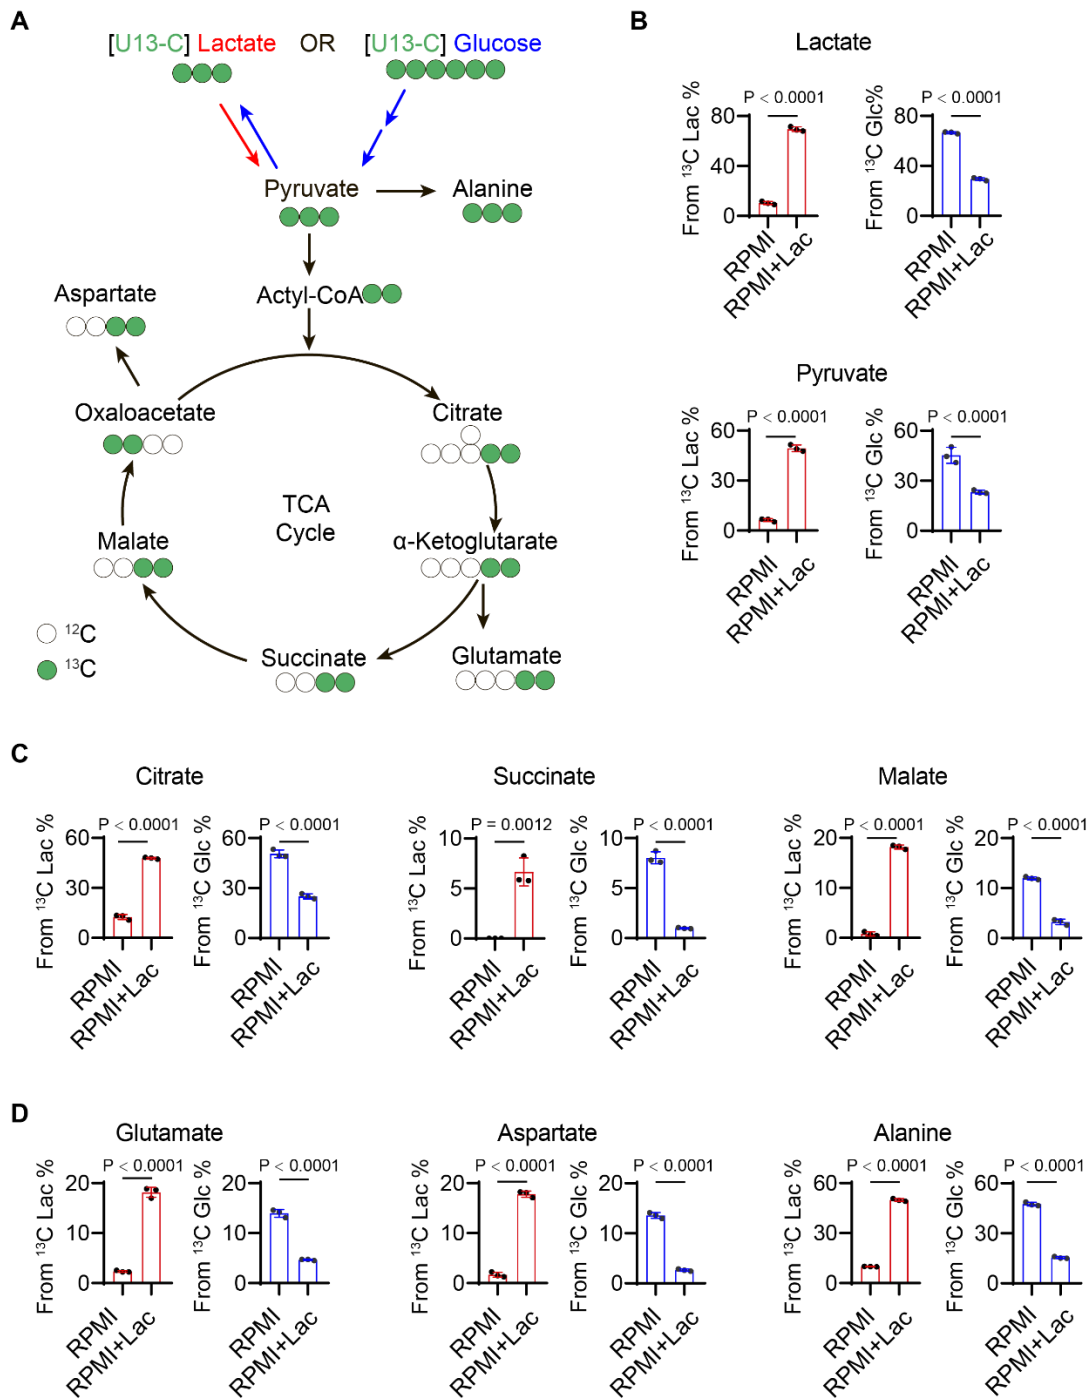

**Supplementary Fig. 7. Lactate feeds TCA cycle during *ex vivo* culture of CD8<sup>+</sup> T cell.**

**a**, Schematic illustration of isotopologues generated from <sup>13</sup>C-glucose or <sup>13</sup>C-lactate. Normalized abundance of intracellular lactate and pyruvate (**b**), TCA cycle intermediates (**c**) and derived amino acids (**d**). Data are shown as means ± SEM. n = 3 biologically independent samples. Source data are provided as a Source Data file.

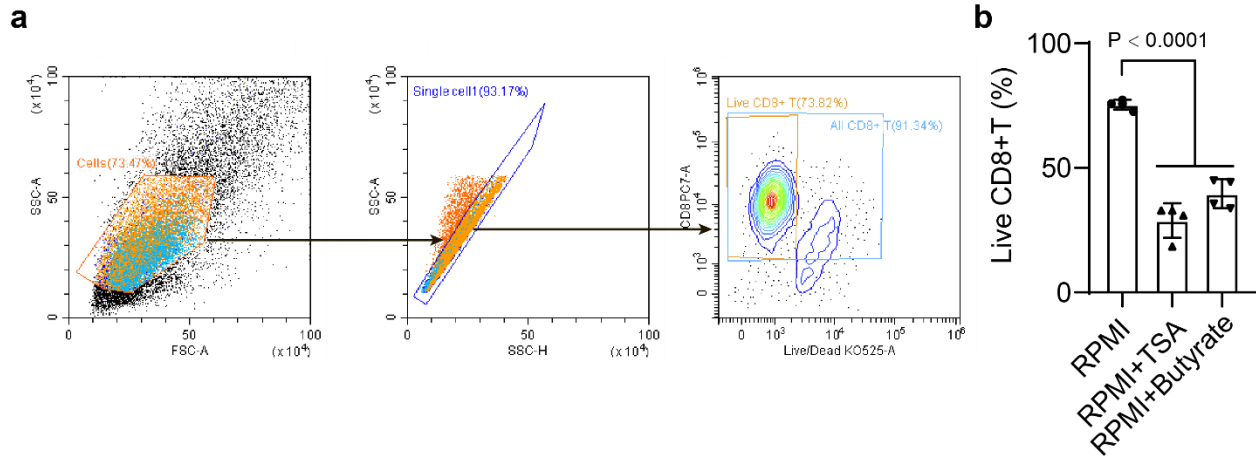

**Supplementary Fig. 8. Cell viability of CD8<sup>+</sup> T cell cultured with TSA or butyrate after 4-day culture.**

**a**, Gating strategy for quantification of live CD8<sup>+</sup> T cells. CD8<sup>+</sup> T cells from OT-I mice were cultured with different drug for 4 days (TSA = 1 nM, Butyrate = 250  $\mu$ M). **b**, Statistical analysis of live CD8<sup>+</sup> T cells with different treatments. n = 4 biologically independent samples. Data are shown as means  $\pm$  SD. P value was determined by one-way ANOVA and corrected by Tukey method for multiple comparisons. Source data are provided as a Source Data file.

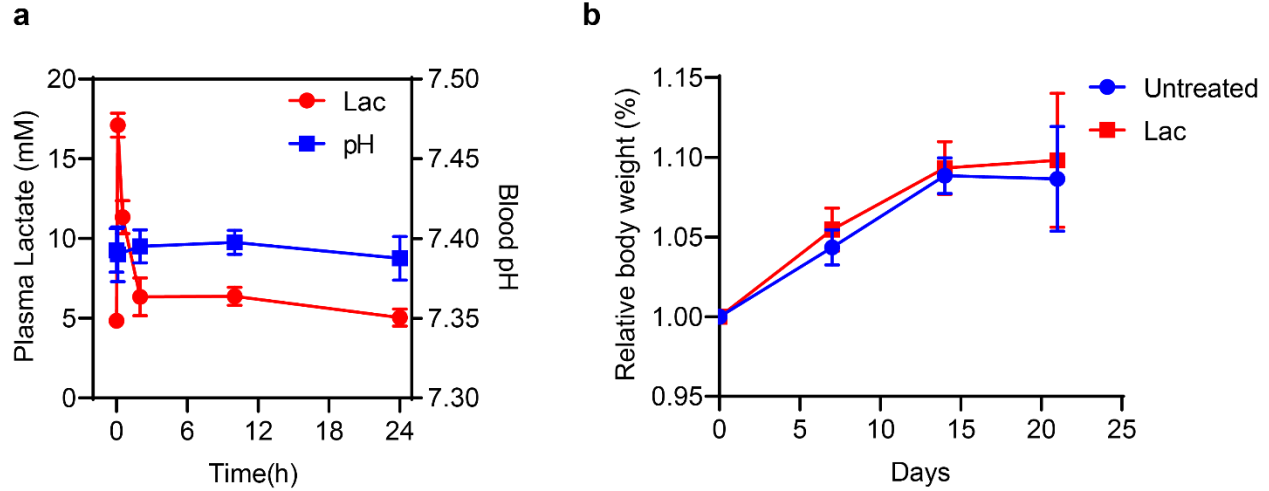

**Supplementary Fig. 9. Effect of subcutaneously injected lactate solution on blood lactate concentrations and pH levels and body weight.**

**a**, Lactate concentration and pH in blood as a function of time after subcutaneous lactate injection (1.68 g/kg). (For lactate,  $n = 3$  biologically independent samples, for pH,  $n = 4$  biologically independent samples). **b**, Change of body weight after daily lactate treatment from Day 0 to 21. ( $n = 5$  biologically independent samples). Data are shown as means  $\pm$  SEM. Source data are provided as a Source Data file.

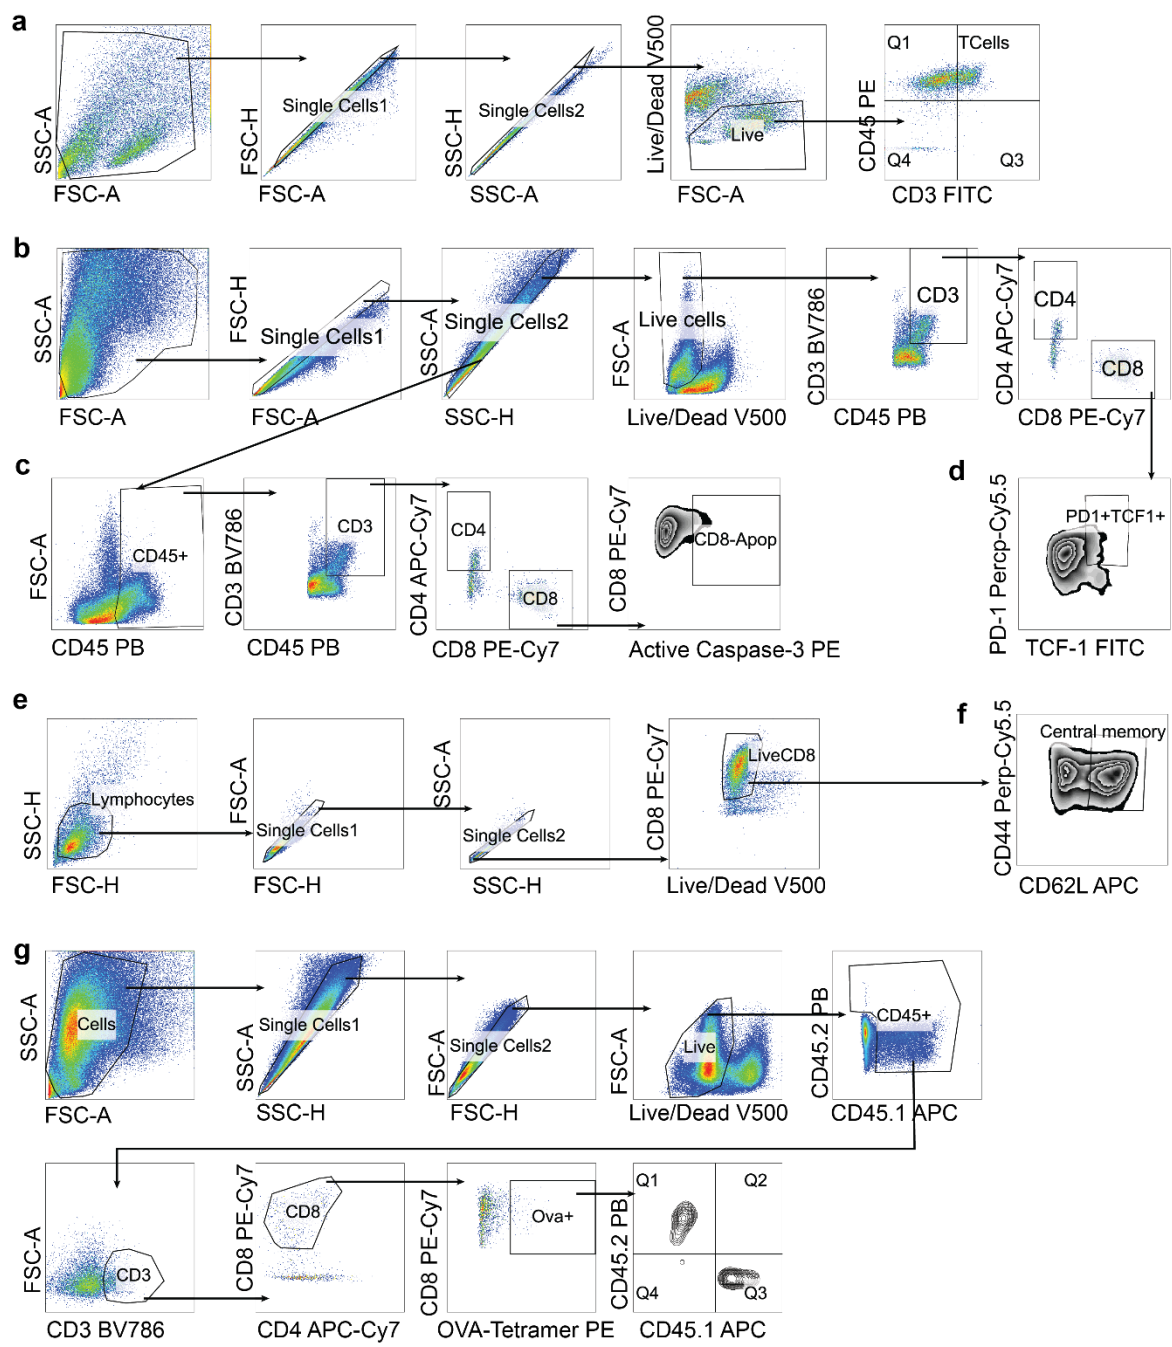

**Supplementary Fig. 10. Gating strategies used for cell sorting and flow cytometry analysis.**

**a**, Gating strategy to sort tumor infiltrating T cells for single cell analysis. Data from sorted cells were used in Fig 3b-d, Fig 4a-b, Supplementary Fig 2, 3, 5. **b**, Gating strategy for analyzing tumor infiltrating CD8<sup>+</sup> T cells number and TCF-1 expression in Fig. 2e, Fig. 3e,f, supplementary Fig. 6a. **c**, Gating strategy for analyzing apoptotic tumor infiltrating CD8<sup>+</sup> T cells in Fig. 2f. **d**, Gating

strategy for analyzing tumor infiltrating stem-like CD8<sup>+</sup> T cells number in Fig. 4d. **e**, Gating strategy for analyzing CD8<sup>+</sup> T cells in cell culture in Fig. 5 b-e, h, i, 6d, supplementary Fig. 6 c, e, f. **f**, Gating strategy for analyzing IL-15 induced memory CD8<sup>+</sup> T cells in cell culture in supplementary Fig. 6d. **g**, Gating strategy for analyzing tumor infiltrating ova-targeting CD8<sup>+</sup> T cells from recipients or donor in Fig. 7d-f.
