# Supplementary material for: Lactate increases stemness of CD8 + T cells to augment anti-tumor immunity
Source: PubMed Central journal article supplement (PMC9448806; doi:10.1038/s41467-022-32521-8), 2022-09-06
Supplement: 41467_2022_32521_MOESM9_ESM.pdf [file 41467_2022_32521_MOESM9_ESM.pdf]

## Reporting Summary

Nature Research wishes to improve the reproducibility of the work that we publish. This form provides structure for consistency and transparency in reporting. For further information on Nature Research policies, see our [Editorial Policies](#) and the [Editorial Policy Checklist](#).

### Statistics

For all statistical analyses, confirm that the following items are present in the figure legend, table legend, main text, or Methods section.

n/a Confirmed

- |                                     |                                     |                                                                                                                                                                                                                                                            |
|-------------------------------------|-------------------------------------|------------------------------------------------------------------------------------------------------------------------------------------------------------------------------------------------------------------------------------------------------------|
| <input type="checkbox"/>            | <input checked="" type="checkbox"/> | The exact sample size ( $n$ ) for each experimental group/condition, given as a discrete number and unit of measurement                                                                                                                                    |
| <input type="checkbox"/>            | <input checked="" type="checkbox"/> | A statement on whether measurements were taken from distinct samples or whether the same sample was measured repeatedly                                                                                                                                    |
| <input type="checkbox"/>            | <input checked="" type="checkbox"/> | The statistical test(s) used AND whether they are one- or two-sided<br><i>Only common tests should be described solely by name; describe more complex techniques in the Methods section.</i>                                                               |
| <input checked="" type="checkbox"/> | <input type="checkbox"/>            | A description of all covariates tested                                                                                                                                                                                                                     |
| <input type="checkbox"/>            | <input checked="" type="checkbox"/> | A description of any assumptions or corrections, such as tests of normality and adjustment for multiple comparisons                                                                                                                                        |
| <input type="checkbox"/>            | <input checked="" type="checkbox"/> | A full description of the statistical parameters including central tendency (e.g. means) or other basic estimates (e.g. regression coefficient) AND variation (e.g. standard deviation) or associated estimates of uncertainty (e.g. confidence intervals) |
| <input type="checkbox"/>            | <input checked="" type="checkbox"/> | For null hypothesis testing, the test statistic (e.g. $F$ , $t$ , $r$ ) with confidence intervals, effect sizes, degrees of freedom and $P$ value noted<br><i>Give <math>P</math> values as exact values whenever suitable.</i>                            |
| <input checked="" type="checkbox"/> | <input type="checkbox"/>            | For Bayesian analysis, information on the choice of priors and Markov chain Monte Carlo settings                                                                                                                                                           |
| <input checked="" type="checkbox"/> | <input type="checkbox"/>            | For hierarchical and complex designs, identification of the appropriate level for tests and full reporting of outcomes                                                                                                                                     |
| <input checked="" type="checkbox"/> | <input type="checkbox"/>            | Estimates of effect sizes (e.g. Cohen's $d$ , Pearson's $r$ ), indicating how they were calculated                                                                                                                                                         |

*Our web collection on [statistics for biologists](#) contains articles on many of the points above.*

### Software and code

Policy information about [availability of computer code](#)

Data collection CytExpert2.4.0.28 (Beckman counter) ; NovaSeq S4(Illumina); FACSDiva9.0.1 (BD biosciences)

Data analysis GraphPad Prism software 8.3; FlowJo10.4; R(3.6.1&4.0.1); Seurat 3.0.1; ClusterProfiler 3.12; Monocle-2; Metaboanalyst 5.0; Limma3.40.5

For manuscripts utilizing custom algorithms or software that are central to the research but not yet described in published literature, software must be made available to editors and reviewers. We strongly encourage code deposition in a community repository (e.g. GitHub). See the Nature Research [guidelines for submitting code & software](#) for further information.

### Data

Policy information about [availability of data](#)

All manuscripts must include a [data availability statement](#). This statement should provide the following information, where applicable:

- Accession codes, unique identifiers, or web links for publicly available datasets
- A list of figures that have associated raw data
- A description of any restrictions on data availability

All data are available in the main text or the supplementary materials. Source data are provided with this paper. The single cell RNA sequencing data generated in this study have been deposited to Zenodo (DOI: 10.5281/zenodo.4387066).

## Field-specific reporting

Please select the one below that is the best fit for your research. If you are not sure, read the appropriate sections before making your selection.

- Life sciences       Behavioural & social sciences       Ecological, evolutionary & environmental sciences

For a reference copy of the document with all sections, see [nature.com/documents/nr-reporting-summary-flat.pdf](https://www.nature.com/documents/nr-reporting-summary-flat.pdf)

## Life sciences study design

All studies must disclose on these points even when the disclosure is negative.

|                 |                                                                                                                                                                                                                                                                                             |
|-----------------|---------------------------------------------------------------------------------------------------------------------------------------------------------------------------------------------------------------------------------------------------------------------------------------------|
| Sample size     | Sample size was determined based on previous publications containing similar procedure to maintain the balance between reaching the statistical significance and minimizing the number of animal/reagents use. Published papers was used as references (PMID:33338425; 32231300; 31185213). |
| Data exclusions | No sample exclusion.                                                                                                                                                                                                                                                                        |
| Replication     | All experiments and in vitro assays were repeated in at least two independent experiments. Single cell transcriptomics and metabolomics were from one experiments and key discoveries were validated with other assays.                                                                     |
| Randomization   | All samples were randomly allocated to experimental groups.                                                                                                                                                                                                                                 |
| Blinding        | No blinding. Blinding was not needed in the study because conditions were well controlled with syngenic mice. Blinding is not typically used in the field.                                                                                                                                  |

## Reporting for specific materials, systems and methods

We require information from authors about some types of materials, experimental systems and methods used in many studies. Here, indicate whether each material, system or method listed is relevant to your study. If you are not sure if a list item applies to your research, read the appropriate section before selecting a response.

### Materials & experimental systems

| n/a                                 | Involved in the study                                           |
|-------------------------------------|-----------------------------------------------------------------|
| <input type="checkbox"/>            | <input checked="" type="checkbox"/> Antibodies                  |
| <input type="checkbox"/>            | <input checked="" type="checkbox"/> Eukaryotic cell lines       |
| <input checked="" type="checkbox"/> | <input type="checkbox"/> Palaeontology and archaeology          |
| <input type="checkbox"/>            | <input checked="" type="checkbox"/> Animals and other organisms |
| <input type="checkbox"/>            | <input checked="" type="checkbox"/> Human research participants |
| <input checked="" type="checkbox"/> | <input type="checkbox"/> Clinical data                          |
| <input checked="" type="checkbox"/> | <input type="checkbox"/> Dual use research of concern           |

### Methods

| n/a                                 | Involved in the study                              |
|-------------------------------------|----------------------------------------------------|
| <input checked="" type="checkbox"/> | <input type="checkbox"/> ChIP-seq                  |
| <input type="checkbox"/>            | <input checked="" type="checkbox"/> Flow cytometry |
| <input checked="" type="checkbox"/> | <input type="checkbox"/> MRI-based neuroimaging    |

## Antibodies

### Antibodies used

InVivoPlus anti-mouse CD4 (GK1.5,BioXcell, Cat# BP0003-1)  
 InVivoPlus anti-mouse CD8 $\alpha$  (53-6.7, BioXcell, Cat# BP0004-1)  
 InVivoPlus anti-mouse CSF1R (AFS98, BioXcell, Cat# BP0213)  
 InVivoPlus anti-mouse PD-1 (29F.1A12, BioXcell, Cat# BP0273)  
 Anti-mouse CD45 (Cell sorting, REA737, Miltenyi, Cat# 130-110-797)  
 Anti-mouse CD3 (Cell sorting, 17A2, biolegend, Cat# 100203 )  
 Anti-mouse CD45 (Flow cytometry, 30-F11, biolegend, Cat# 103126)  
 Anti-mouse CD3E (Flow cytometry, 145-2C11, biolegend, Cat# 100355)  
 Anti-mouse CD8 $\alpha$  (Flow cytometry, 53-6.7, biolegend, Cat# 100721)  
 Anti- active Caspase-3 (Flow cytometry, C92-605, BD, Cat# 550821)  
 Anti-mouse PD-1 (Flow cytometry, 29F.1A12, biolegend, Cat# 135207)  
 Anti-mouse Lag-3 (Flow cytometry, C9B7W, biolegend, Cat# 125209)  
 Anti-TCF1/TCF7 (Flow cytometry, C63D9, Cell signaling Technology, Cat# 64445)  
 Anti-mouse CXCR3 (Flow cytometry, CXCR3-173, biolegend, Cat# 126511)  
 Anti-human CD8 (Flow cytometry, SK1, biolegend, Cat# 344711)  
 Anti-human CXCR3 (Flow cytometry, G025H7, Biolegend, Cat# 353707)  
 Anti-mouse CD45.1 (Flow cytometry, A20, biolegend, Cat# 110713)  
 Anti-mouse CD45.2 (Flow cytometry, 104, biolegend, Cat# 109819)  
 Anti-mouse CD3 (Cell activation, 17A2, biolegend, Cat# 100239)  
 Anti-mouse CD28 (Cell activation, 37.51, Biolegend, Cat# 102115)  
 iTAg Tetramer/PE - H-2 Kb OVA (SIINFEKL, invivogen, Cat# vac-sin)

## Validation

Histone H3 Antibody (Western Blot, Cell signaling Technology, Cat# 9715S)  
 Histone H3K27ac antibody (mAb) (CUT&RUN, WB, Active Motif, Cat# 39085)  
 Rabbit (DA1E) mAb IgG XP® Isotype Control (CUT&RUN, Cell signaling Technology, Cat# 66362S)  
 Anti-rabbit IgG (H+L) (DyLight™ 800 4X PEG Conjugate) (Cell Signaling Technology, Cat# 5151P)  
 Anti-mouse IgG (H+L) (DyLight™ 680 Conjugate)(Cell Signaling Technology, Cat# 5470P)

All antibodies are from commercial companies and are well validated by manufacturer and widely used in researches. Their validation data are available on the manufacturer's websites:

InVivoPlus anti-mouse CD4 (GK1.5, BioXcell, Cat# BP0003-1):  
<https://bxccl.com/product/invivoplus-anti-m-cd4/>

InVivoPlus anti-mouse CD8α (53-6.7, BioXcell, Cat# BP0004-1):  
<https://bxccl.com/product/invivoplus-anti-m-cd8a/>

InVivoPlus anti-mouse CSF1R (AFS98, BioXcell, Cat# BE0213):  
<https://bxccl.com/product/invivoplus-anti-mouse-csf1r-cd115/>

InVivoPlus anti-mouse PD-1 (29F.1A12, BioXcell, Cat# BP0273):  
<https://bxccl.com/product/invivoplus-anti-mouse-pd-1-cd279/>

Anti-mouse CD45 (Cell sorting, REA737, Miltenyi, Cat# 130-110-797):  
<https://www.miltenyibiotec.com/US-en/products/cd45-antibody-anti-mouse-reafinity-rea737.html#vioblue:30-ug-in-200-ul>

Anti-mouse CD3 (Cell sorting, 17A2, biolegend, Cat# 100203):  
<https://www.biolegend.com/en-us/products/fitc-anti-mouse-cd3-antibody-45>

Anti-mouse CD45 (Flow cytometry, 30-F11, biolegend, Cat# 103126):  
<https://www.biolegend.com/en-us/products/pacific-blue-anti-mouse-cd45-antibody-3102>

Anti-mouse CD3E (Flow cytometry, 145-2C11, biolegend, Cat# 100355):  
<https://www.biolegend.com/en-us/products/brilliant-violet-785-anti-mouse-cd3epsilon-antibody-12081>

Anti-mouse CD8α (Flow cytometry, 53-6.7, biolegend, Cat# 100721):  
<https://www.biolegend.com/en-us/products/pe-cyanine7-anti-mouse-cd8a-antibody-1906>

Anti- active Caspase-3 (Flow cytometry, C92-605, BD, Cat# 550821):  
<https://www.bdbiosciences.com/en-us/products/reagents/flow-cytometry-reagents/research-reagents/single-color-antibodies-ruo/pe-rabbit-anti-active-caspase-3.550821>

Anti-mouse PD-1 (Flow cytometry, 29F.1A12, biolegend, Cat# 135207):  
<https://www.biolegend.com/en-us/products/percp-cyanine5-5-anti-mouse-cd279-pd-1-antibody-6496>

Anti-TCF1/TCF7 (Flow cytometry, C63D9, Cell signaling Technology, Cat# 6444S):  
[https://www.cellsignal.com/products/antibody-conjugates/tcf1-tcf7-c63d9-rabbit-mab-alexa-fluor-488-conjugate/6444?site-search-type=Products&N=4294956287&Ntt=6444s&fromPage=plp&\\_requestid=29298](https://www.cellsignal.com/products/antibody-conjugates/tcf1-tcf7-c63d9-rabbit-mab-alexa-fluor-488-conjugate/6444?site-search-type=Products&N=4294956287&Ntt=6444s&fromPage=plp&_requestid=29298)

Anti-mouse CXCR3 (Flow cytometry, CXCR3-173, biolegend, Cat# 126511):  
<https://www.biolegend.com/en-us/products/apc-anti-mouse-cd183-cxcr3-antibody-4683>

Anti-human CD8 (Flow cytometry, SK1, biolegend, Cat# 344711):  
<https://www.biolegend.com/en-us/products/pe-cyanine7-anti-human-cd8-antibody-6390>

Anti-human CXCR3 (Flow cytometry, G025H7, Biolegend, Cat# 353707):  
<https://www.biolegend.com/en-us/products/apc-anti-human-cd183-cxcr3-antibody-7580>

Anti-mouse CD45.1 (Flow cytometry, A20, biolegend, Cat# 110713):  
<https://www.biolegend.com/en-us/products/apc-anti-mouse-cd45-1-antibody-2319>

Anti-mouse CD45.2 (Flow cytometry, 104, biolegend, Cat# 109819):  
<https://www.biolegend.com/en-us/products/pacific-blue-anti-mouse-cd45-2-antibody-3108>

Anti-mouse CD3 (Cell activation, 17A2, biolegend, Cat# 100239):  
<https://www.biolegend.com/en-us/products/ultra-leaf-purified-anti-mouse-cd3-antibody-8078>

Anti-mouse CD28 (Cell activation, 37.51, Biolegend, Cat# 102115):  
<https://www.biolegend.com/en-us/products/ultra-leaf-purified-anti-mouse-cd28-antibody-7733>

iTag Tetramer/PE - H-2 Kb OVA (SIINFELK, MBL, Cat# TB-5001-1):  
<https://www.mblintl.com/products/tb-5001-1/>

Histone H3 Antibody (Western Blot, Cell signaling Technology, Cat# 9715S):  
[https://www.cellsignal.com/products/primary-antibodies/histone-h3-antibody/9715?site-search-type=Products&N=4294956287&Ntt=9715s&fromPage=plp&\\_requestid=29798](https://www.cellsignal.com/products/primary-antibodies/histone-h3-antibody/9715?site-search-type=Products&N=4294956287&Ntt=9715s&fromPage=plp&_requestid=29798)

Histone H3K27ac antibody (mAb) (CUT&RUN, WB, Active Motif, Cat# 39085):  
<https://www.activemotif.com/catalog/details/39685/histone-h3-acetyl-lys27-antibody-mab-clone-mabi-0309>

Rabbit (DA1E) mAb IgG XP® Isotype Control (CUT&RUN, Cell signaling Technology, Cat# 66362S):  
[https://www.cellsignal.com/products/primary-antibodies/rabbit-da1e-mab-igg-xp-isotype-control-cut-amp-run/66362?site-search-type=Products&N=4294956287&Ntt=66362s&fromPage=plp&\\_requestid=29849](https://www.cellsignal.com/products/primary-antibodies/rabbit-da1e-mab-igg-xp-isotype-control-cut-amp-run/66362?site-search-type=Products&N=4294956287&Ntt=66362s&fromPage=plp&_requestid=29849)

Anti-rabbit IgG (H+L) (DyLight™ 800 4X PEG Conjugate) (Cell Signaling Technology, Cat# 5151P):  
[https://www.cellsignal.com/products/secondary-antibodies/anti-rabbit-igg-h-l-dylight-800-4x-peg-conjugate/5151?site-search-type=Products&N=4294956287&Ntt=5151p&fromPage=plp&\\_requestid=29885](https://www.cellsignal.com/products/secondary-antibodies/anti-rabbit-igg-h-l-dylight-800-4x-peg-conjugate/5151?site-search-type=Products&N=4294956287&Ntt=5151p&fromPage=plp&_requestid=29885)

Anti-mouse IgG (H+L) (DyLight™ 680 Conjugate)(Cell Signaling Technology, Cat# 5470P):  
[https://www.cellsignal.com/products/secondary-antibodies/anti-mouse-igg-h-l-dylight-680-conjugate/5470?site-search-type=Products&N=4294956287&Ntt=5470p&fromPage=plp&\\_requestid=29924](https://www.cellsignal.com/products/secondary-antibodies/anti-mouse-igg-h-l-dylight-680-conjugate/5470?site-search-type=Products&N=4294956287&Ntt=5470p&fromPage=plp&_requestid=29924)

## Eukaryotic cell lines

Policy information about [cell lines](#)

|                                                                   |                                                                                                                                                                                                                                                                                                                                                                        |
|-------------------------------------------------------------------|------------------------------------------------------------------------------------------------------------------------------------------------------------------------------------------------------------------------------------------------------------------------------------------------------------------------------------------------------------------------|
| Cell line source(s)                                               | Murine melanoma B16F10 and colon adenocarcinoma MC38 cell lines were purchased from American Type Culture Collection (ATCC). TC-1 is a tumor cell line transformed from C57BL/6 primary mouse lung epithelial cells and expressing HPV16 E6, E7 and c-Ha-ras oncoproteins. This cell line is generated and kindly provided by Dr. T.C. Wu at Johns Hopkins University. |
| Authentication                                                    | No further authentication was performed before use.                                                                                                                                                                                                                                                                                                                    |
| Mycoplasma contamination                                          | All cell line used were tested Mycoplasma-free before use.                                                                                                                                                                                                                                                                                                             |
| Commonly misidentified lines (See <a href="#">ICLAC</a> register) | No commonly misidentified cell line was used.                                                                                                                                                                                                                                                                                                                          |

## Palaeontology and Archaeology

|                                                                                                                                                 |                                                                                                                                                                                                                                                                                      |
|-------------------------------------------------------------------------------------------------------------------------------------------------|--------------------------------------------------------------------------------------------------------------------------------------------------------------------------------------------------------------------------------------------------------------------------------------|
| Specimen provenance                                                                                                                             | <i>Provide provenance information for specimens and describe permits that were obtained for the work (including the name of the issuing authority, the date of issue, and any identifying information).</i>                                                                          |
| Specimen deposition                                                                                                                             | <i>Indicate where the specimens have been deposited to permit free access by other researchers.</i>                                                                                                                                                                                  |
| Dating methods                                                                                                                                  | <i>If new dates are provided, describe how they were obtained (e.g. collection, storage, sample pretreatment and measurement), where they were obtained (i.e. lab name), the calibration program and the protocol for quality assurance OR state that no new dates are provided.</i> |
| <input type="checkbox"/> Tick this box to confirm that the raw and calibrated dates are available in the paper or in Supplementary Information. |                                                                                                                                                                                                                                                                                      |
| Ethics oversight                                                                                                                                | <i>Identify the organization(s) that approved or provided guidance on the study protocol, OR state that no ethical approval or guidance was required and explain why not.</i>                                                                                                        |

Note that full information on the approval of the study protocol must also be provided in the manuscript.

## Animals and other organisms

Policy information about [studies involving animals](#); [ARRIVE guidelines](#) recommended for reporting animal research

|                         |                                                                                                                                                                                                                                                                               |
|-------------------------|-------------------------------------------------------------------------------------------------------------------------------------------------------------------------------------------------------------------------------------------------------------------------------|
| Laboratory animals      | 6–10 weeks. Female or male C57BL/6J (Strain #:000664), NOD.Cg-Prkdcscid/J (Strain #:001303), C57BL/6-Tg(TcraTcrb)1100Mjb/J (Strain #:003831), B6.129S7-Rag1tm1Mom/J (Strain #:002216), B6.SJL-PtprcaPepcb/BoyJ (Strain #:002014) mice were purchased from Jackson Laboratory. |
| Wild animals            | No wild animal was used.                                                                                                                                                                                                                                                      |
| Field-collected samples | No field-collected sample was used.                                                                                                                                                                                                                                           |
| Ethics oversight        | All animal experiments were performed with ethical compliance and approval from Institutional Animal Care and Use Committee of the University of Texas Southwestern Medical Center.                                                                                           |

Note that full information on the approval of the study protocol must also be provided in the manuscript.

## Human research participants

Policy information about [studies involving human research participants](#)

|                            |                                                                                                                                                                                                                                                        |
|----------------------------|--------------------------------------------------------------------------------------------------------------------------------------------------------------------------------------------------------------------------------------------------------|
| Population characteristics | Sterile blood was obtained at the time of cesarean section from de-identified human umbilical cords that are normally discarded. To maintain anonymity, links between the donor's medical and social histories including fetal sex are not maintained. |
|----------------------------|--------------------------------------------------------------------------------------------------------------------------------------------------------------------------------------------------------------------------------------------------------|

Recruitment

The cord blood were from random de-identified patients. No potential self-selection bias.

Ethics oversight

Human cord blood samples were obtained from UT Southwestern (UTSW) Parkland Hospital in compliance to the regulation and the use approval of human cord blood at UTSW medical center (STU 112010-047). The procedure is approved through a protocol exempt from informed consent as approved by the Institutional Review Board of UTSW and the Office for Human Research Protections (OHRP) supported by the U.S. Department of Health and Human Services.

Note that full information on the approval of the study protocol must also be provided in the manuscript.

## Flow Cytometry

### Plots

Confirm that:

- The axis labels state the marker and fluorochrome used (e.g. CD4-FITC).
- The axis scales are clearly visible. Include numbers along axes only for bottom left plot of group (a 'group' is an analysis of identical markers).
- All plots are contour plots with outliers or pseudocolor plots.
- A numerical value for number of cells or percentage (with statistics) is provided.

### Methodology

Sample preparation

Single cell suspensions were obtained from cell culture or mouse tissues. Mouse tumors were dissociated by Collagenase (1 mg/mL) and DNase I (0.2 mg/mL) and lymph nodes were dissociated with 70  $\mu$ m cell strainer. For each single cell suspension, Fc receptor was blocked with anti-Fc $\gamma$ III/II (clone 2.4G2) for 20 minutes, followed by staining with selective antibodies of cell surface markers and live/dead dyes. Intracellular markers including active caspase 3 and TCF-1 were stained after cell permeabilization with True-Nuclear transcription factor buffer set (BioLegend). Data were collected on BD LSR Fortessa or Beckman CytoFLEX flow cytometer and analyzed by FlowJo (Tree Star Inc., Ashland, OR) software.

Instrument

cytoFLEX (Backman coulter),BD LSRFortessa

Software

CytExpert2.4.0.28, FlowJo software v9.3.2, BD FACSDiva v9.0.1,

Cell population abundance

For in vitro analysis, at least 5000 live CD8 T cell were collected for analysis. For in vivo analysis, at least 20000 live CD45 Cell were collected for analysis.

Gating strategy

Physical parameter and fixable viability Dye eFlour 506 (eBioscience) was used to exclude the dead cells. Positive populations were defined using not stained cells as reference. Isotype controls were used to confirm the specificity of the staining

- Tick this box to confirm that a figure exemplifying the gating strategy is provided in the Supplementary Information.
